# Supplementary material for: Repetitive subconcussion results in disrupted neural activity independent of concussion history
Source: bioRxiv or medRxiv preprint supplement (doi:10.1101/2024.03.31.24304818), 2024-04-01
Supplement: Supplementary file [file media-1.pdf]

# Supplementary material

## Magnetoencephalography low gamma 30-55 Hz functional connectivity

(i) Low blast

(ii) High blast

(iii) High minus low

### A Posterior default mode network: Low blast > high blast

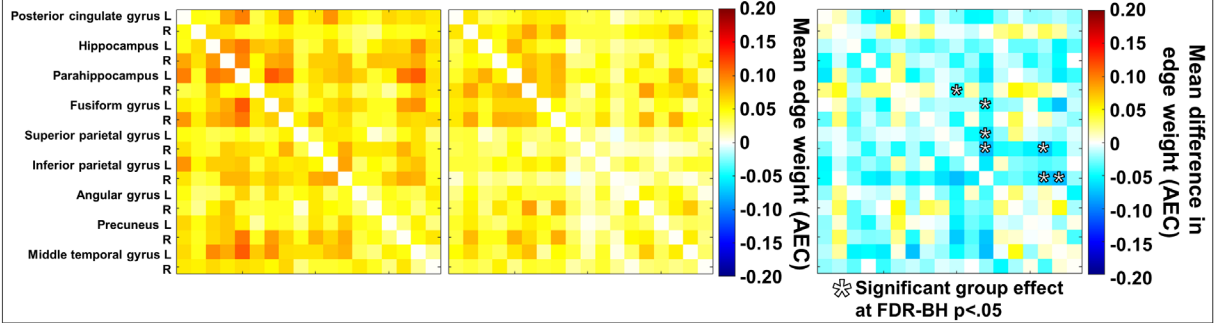

### B Anterior default mode network: no blast-related differences

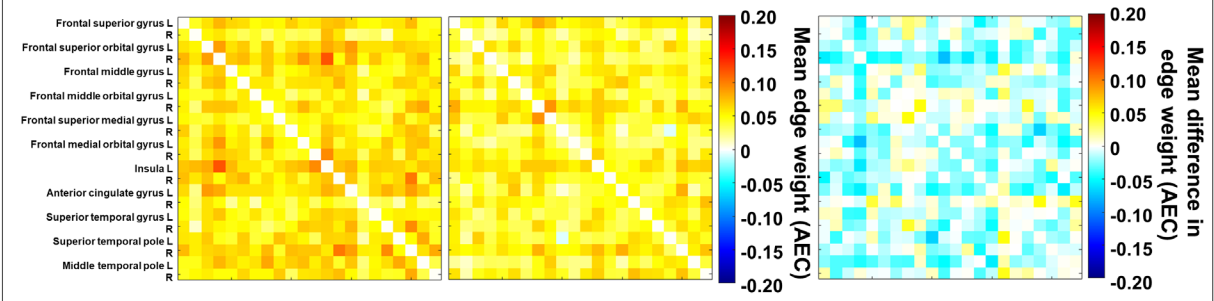

### C Attention network: no blast-related differences

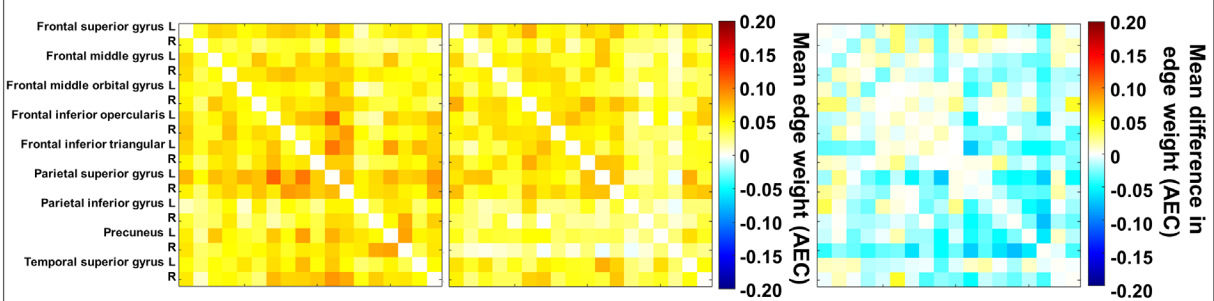

### D Central executive network: no blast-related differences

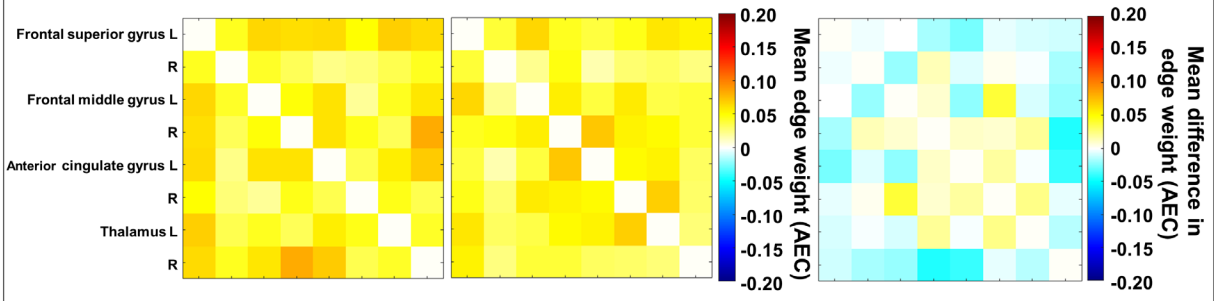

**Figure S1:** Functional connectivity matrices scaled by mean edge weight (AEC) measured by resting-state magnetoencephalography (MEG) at low gamma (30-55 Hz) range in the **(A)** posterior (pDMN) and **(B)** anterior default mode networks (aDMN), **(C)** attention network (AN), and **(D)** central executive control network (CEN) with the mean connectivity for individuals with **(i)** low blast exposure and **(ii)** high blast exposure, and **(iii)** the group difference. **(Aiii)** In the pDMN, there was significantly lower connectivity in the high blast **(Aii)** relative to the low blast exposure group **(Ai)** for 7 nodes and 7 edges at low gamma; the node with the highest degree was the right inferior parietal. There were no blast-related differences in **(B)** aDMN, **(C)** AN, or **(D)** CEN functional connectivity as measured by MEG at low gamma. Warm elements in the **(i, ii)** group mean matrices indicate higher connectivity and cool colours indicate lower connectivity; warm elements in the **(iii)** group difference matrices indicate higher connectivity in the high blast group and cool colours indicate lower connectivity in the high blast group.

Magnetoencephalography low gamma 30-55 Hz functional connectivity

(i) Low blast

(ii) High blast

(iii) High minus low

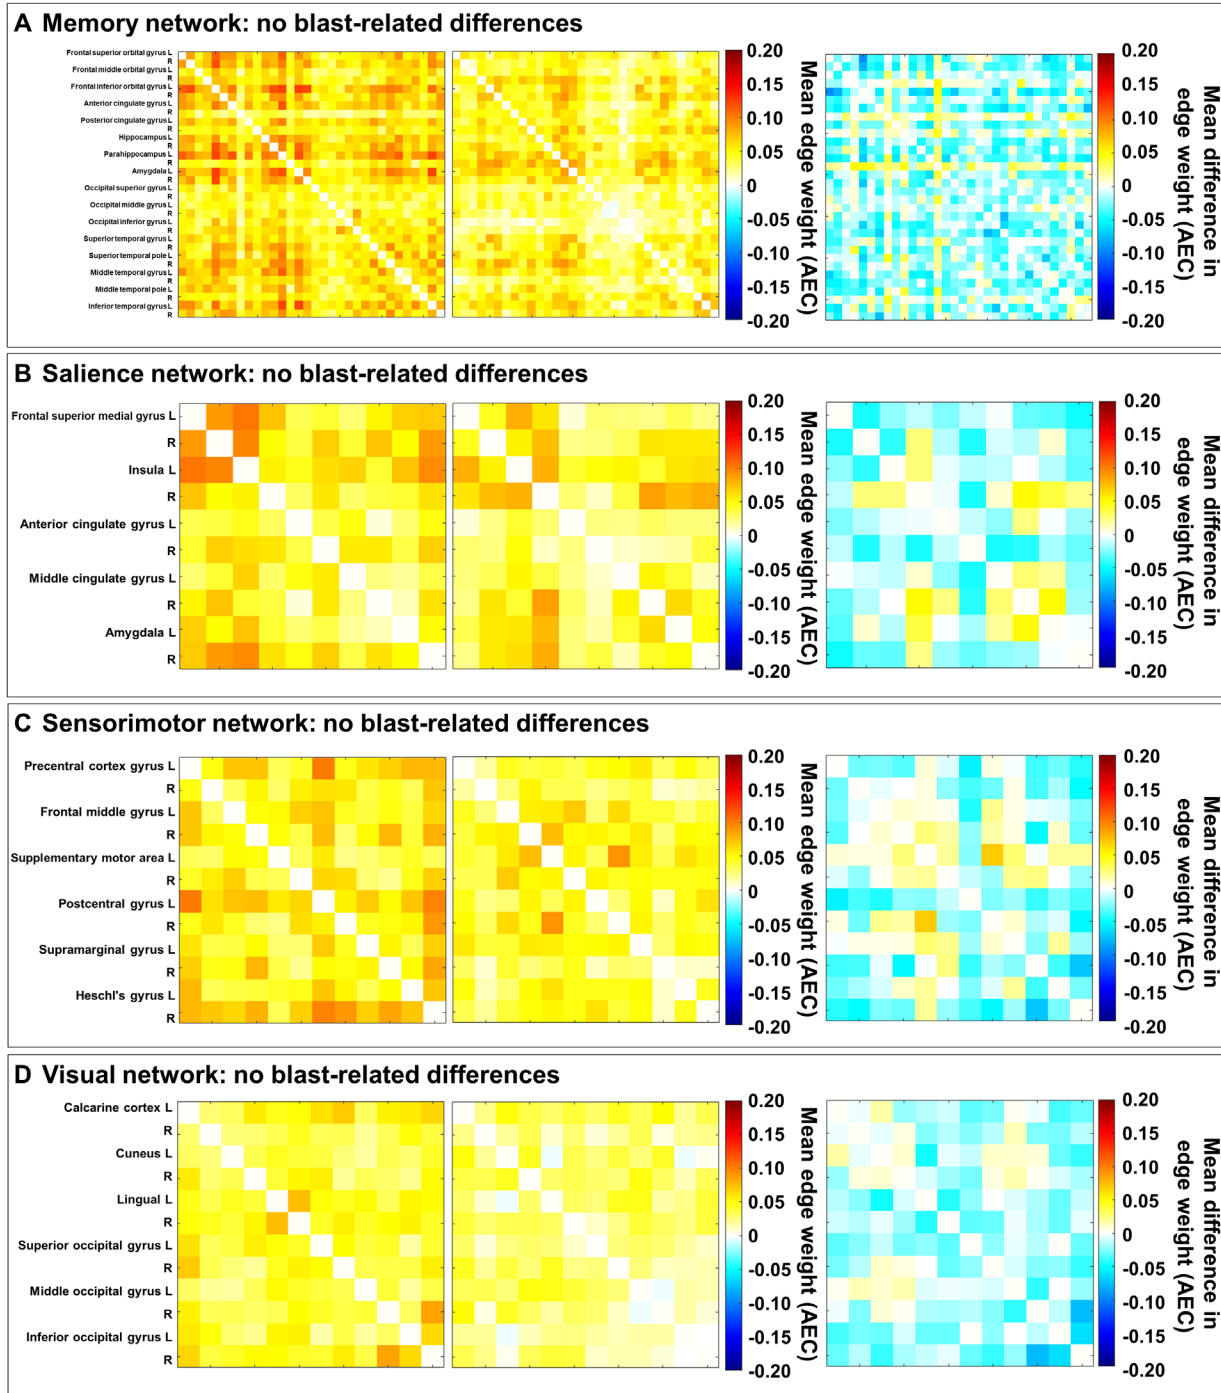

**Figure S2:** Functional connectivity matrices scaled by mean edge weight (AEC) measured by resting-state magnetoencephalography (MEG) at low gamma (30-55 Hz) range in the (A) memory network (MN), (B) salience network (SN), (C) sensorimotor network (SMN), and (D) visual network (VN) with the mean connectivity for individuals with (i) low blast exposure and (ii) high blast exposure, and (iii) the group difference.

There were no blast-related differences in (A) MN, (B) SN, (C) SMN, or (D) VN functional connectivity as measured by MEG at low gamma. Warm elements in the (i, ii) group mean matrices indicate higher connectivity and cool colours indicate lower connectivity; warm elements in the (iii) group difference matrices indicate higher connectivity in the high blast group and cool colours indicate lower connectivity in the high blast group.

Magnetoencephalography high gamma 80-150 Hz functional connectivity

(i) Low blast

(ii) High blast

(iii) High minus low

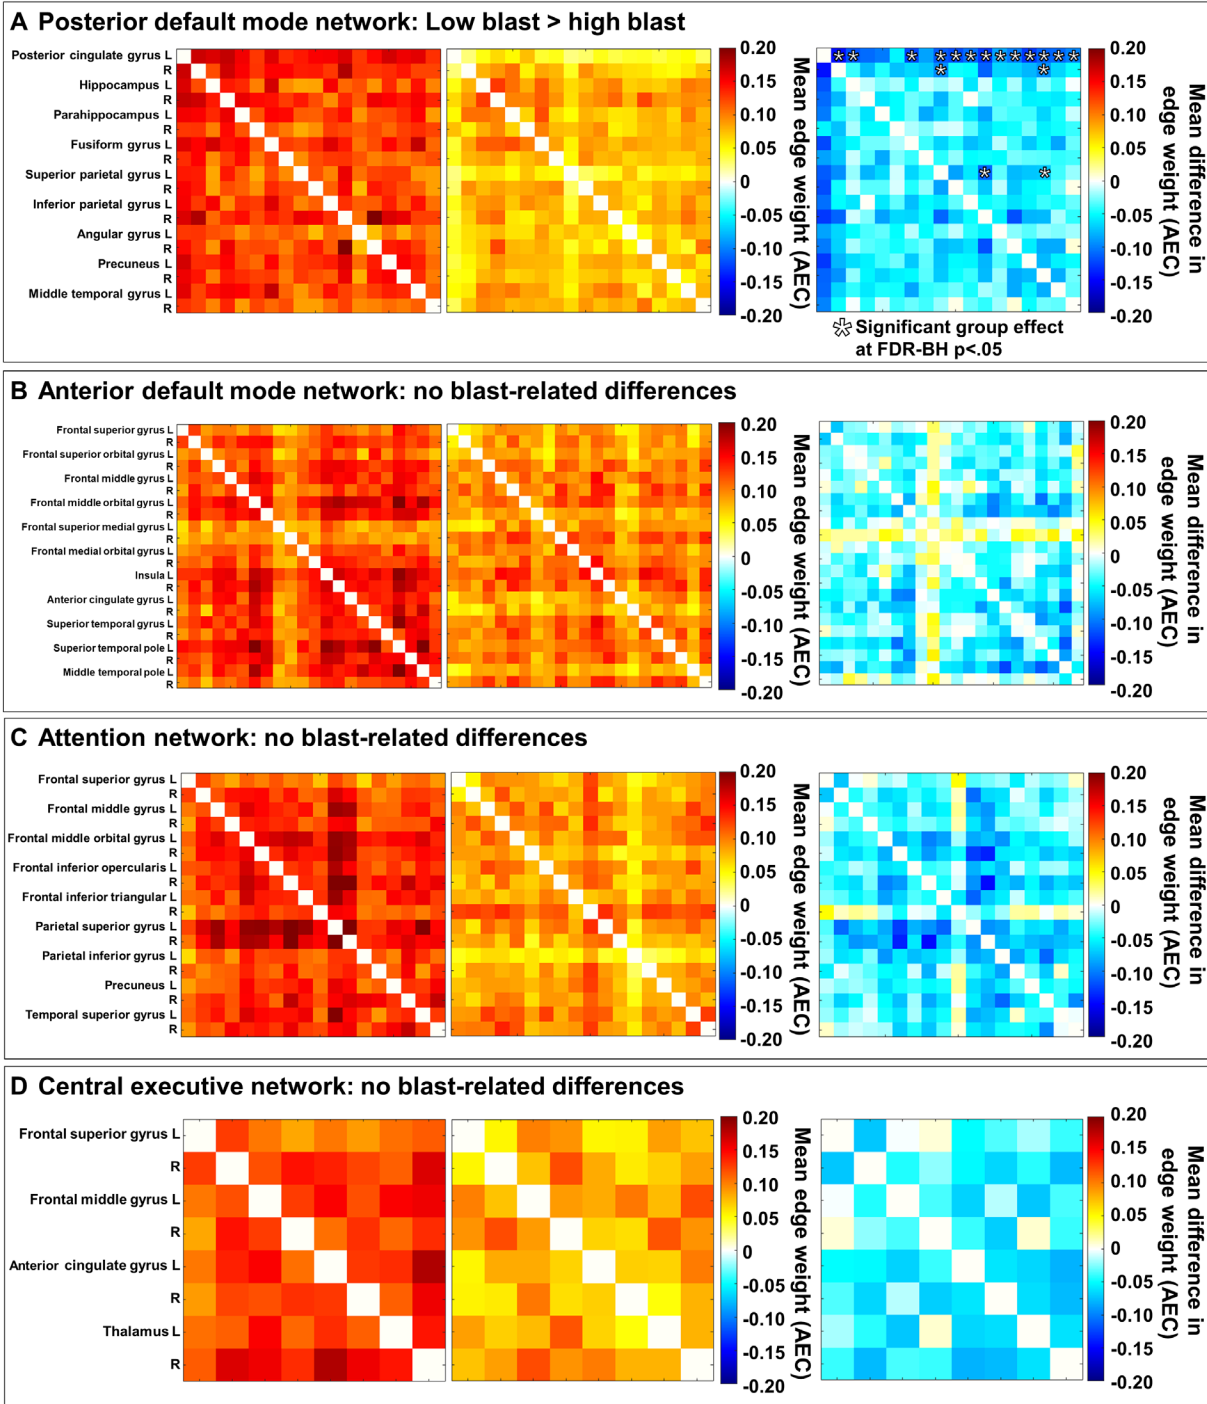

**Figure S3:** Functional connectivity matrices scaled by mean edge weight (AEC) measured by resting-state magnetoencephalography (MEG) at high gamma (80-150 Hz) range in the (A) posterior (pDMN) and (B) anterior default mode networks (aDMN), (C) attention network (AN), and (D) central executive control network (CEN) with the mean connectivity for individuals with (i) low blast exposure and (ii) high blast exposure, and

(iii) the group difference. (Aiii) In the pDMN, there was significantly lower connectivity in the high blast (Aii) relative to the low blast exposure group (Ai) for 14 nodes and 17 edges at high gamma; the node with the highest degree was the left posterior cingulate. There were no blast-related differences in (B) aDMN, (C) AN, or (D) CEN functional connectivity as measured by MEG at high gamma. Warm elements in the (i, ii) group mean matrices indicate higher connectivity and cool colours indicate lower connectivity; warm elements in the (iii) group difference matrices indicate higher connectivity in the high blast group and cool colours indicate lower connectivity in the high blast group.

### Magnetoencephalography high gamma 80-150 Hz functional connectivity

(i) Low blast

(ii) High blast

(iii) High minus low

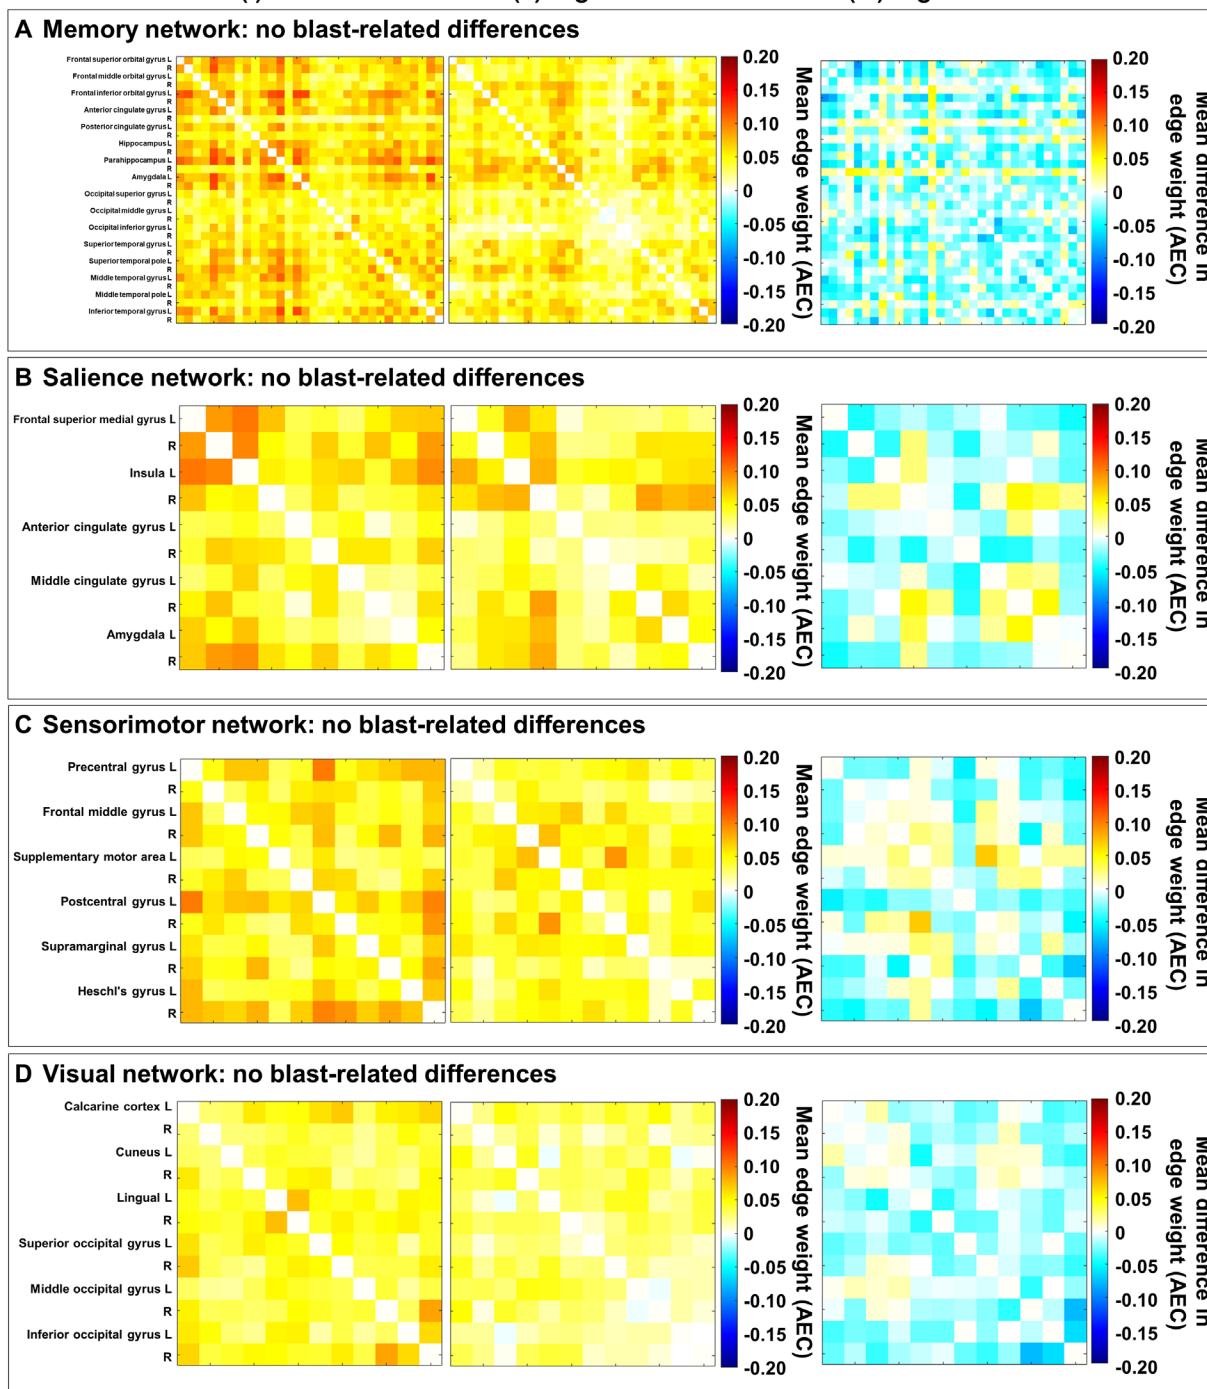

**Figure S4:** Functional connectivity matrices scaled by mean edge weight (AEC) measured by resting-state magnetoencephalography (MEG) at high gamma (80-150 Hz) range in the (A) memory network (MN), (B) salience network (SN), (C) sensorimotor network (SMN), and (D) visual network (VN) with the mean connectivity for individuals with (i) low blast exposure and (ii) high blast exposure, and (iii) the group difference.

There were no blast-related differences in **(A)** MN, **(B)** SN, **(C)** SMN, or **(D)** VN functional connectivity as measured by MEG at high gamma. Warm elements in the **(i, ii)** group mean matrices indicate higher connectivity and cool colours indicate lower connectivity; warm elements in the **(iii)** group difference matrices indicate higher connectivity in the high blast group and cool colours indicate lower connectivity in the high blast group.



Functional MRI functional connectivity: no blast-related differences

(i) Low blast

(ii) High blast

(iii) High minus low

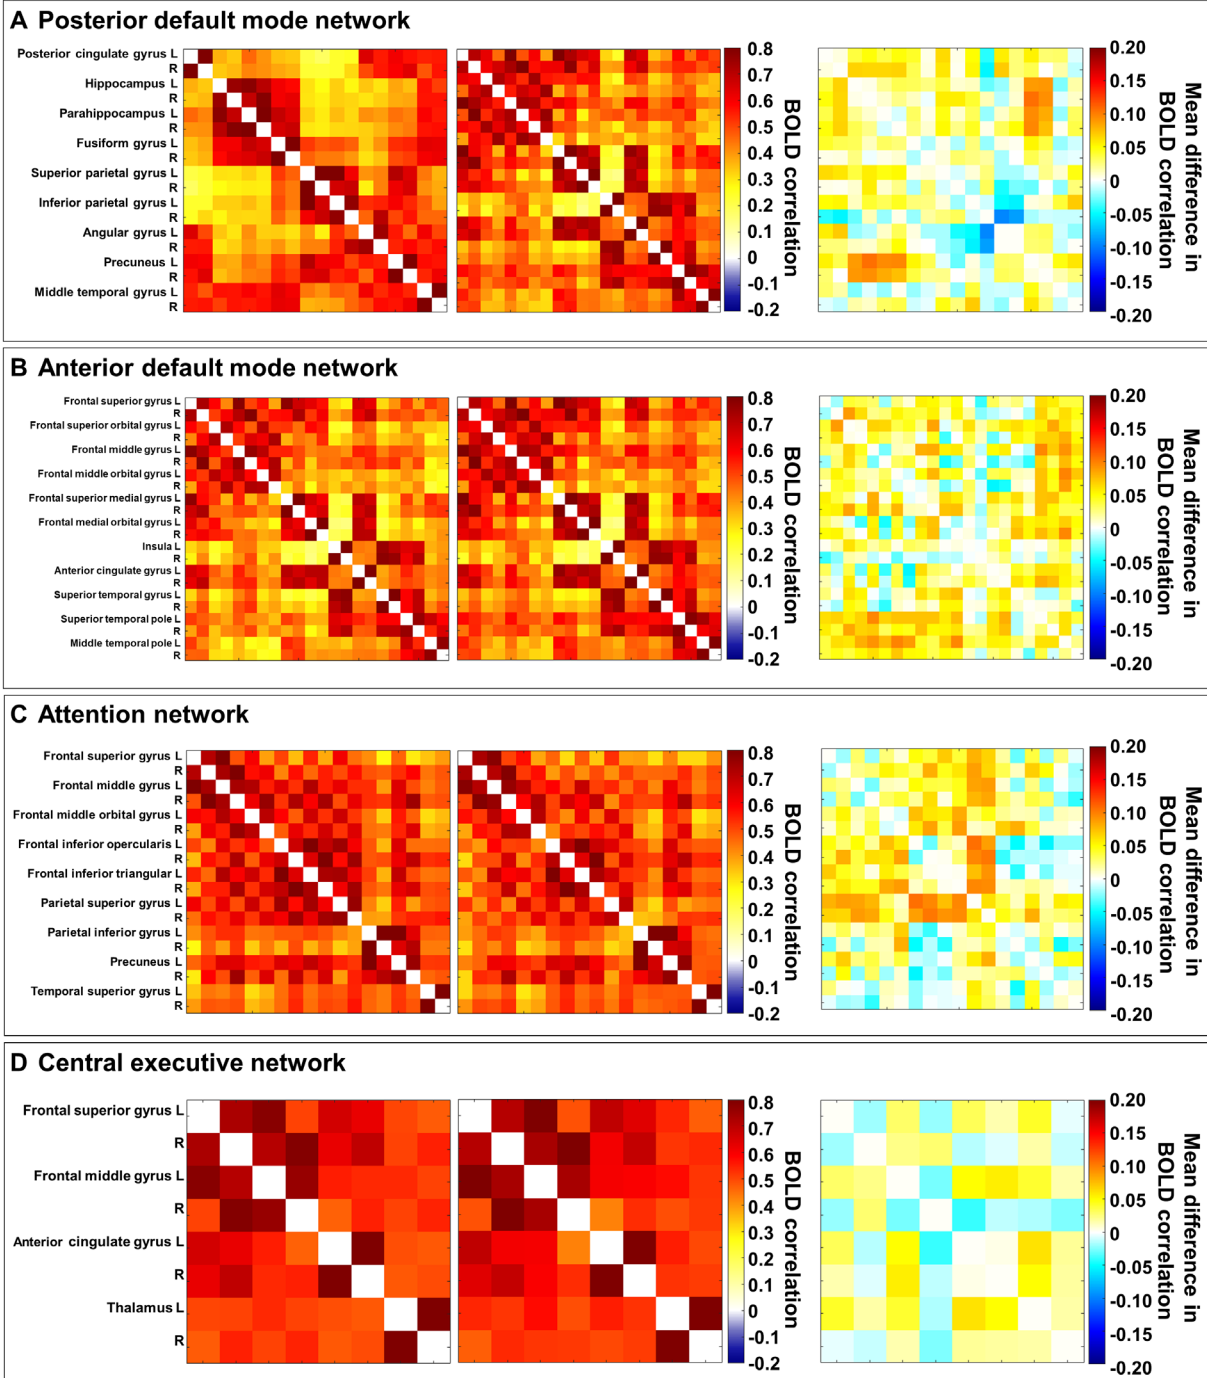

**Figure S5:** Functional connectivity matrices scaled by BOLD correlations indicated by resting-state functional MRI in the (A) posterior (pDMN) and (B) anterior default mode networks (aDMN), (C) attention network (AN), and (D) central executive control network (CEN) with the mean connectivity for individuals with (i) low blast exposure and (ii) high blast exposure, and (iii) the group difference. There were no blast-related differences in

(A) pDMN, (B) aDMN, (C) AN, or (D) CEN functional connectivity as measured by functional MRI. Warm elements in the (i, ii) group mean matrices indicate higher connectivity and cool colours indicate lower connectivity; warm elements in the (iii) group difference matrices indicate higher connectivity in the high blast group and cool colours indicate lower connectivity in the high blast group.

Functional MRI functional connectivity: no blast-related differences

(i) Low blast

(ii) High blast

(iii) High minus low

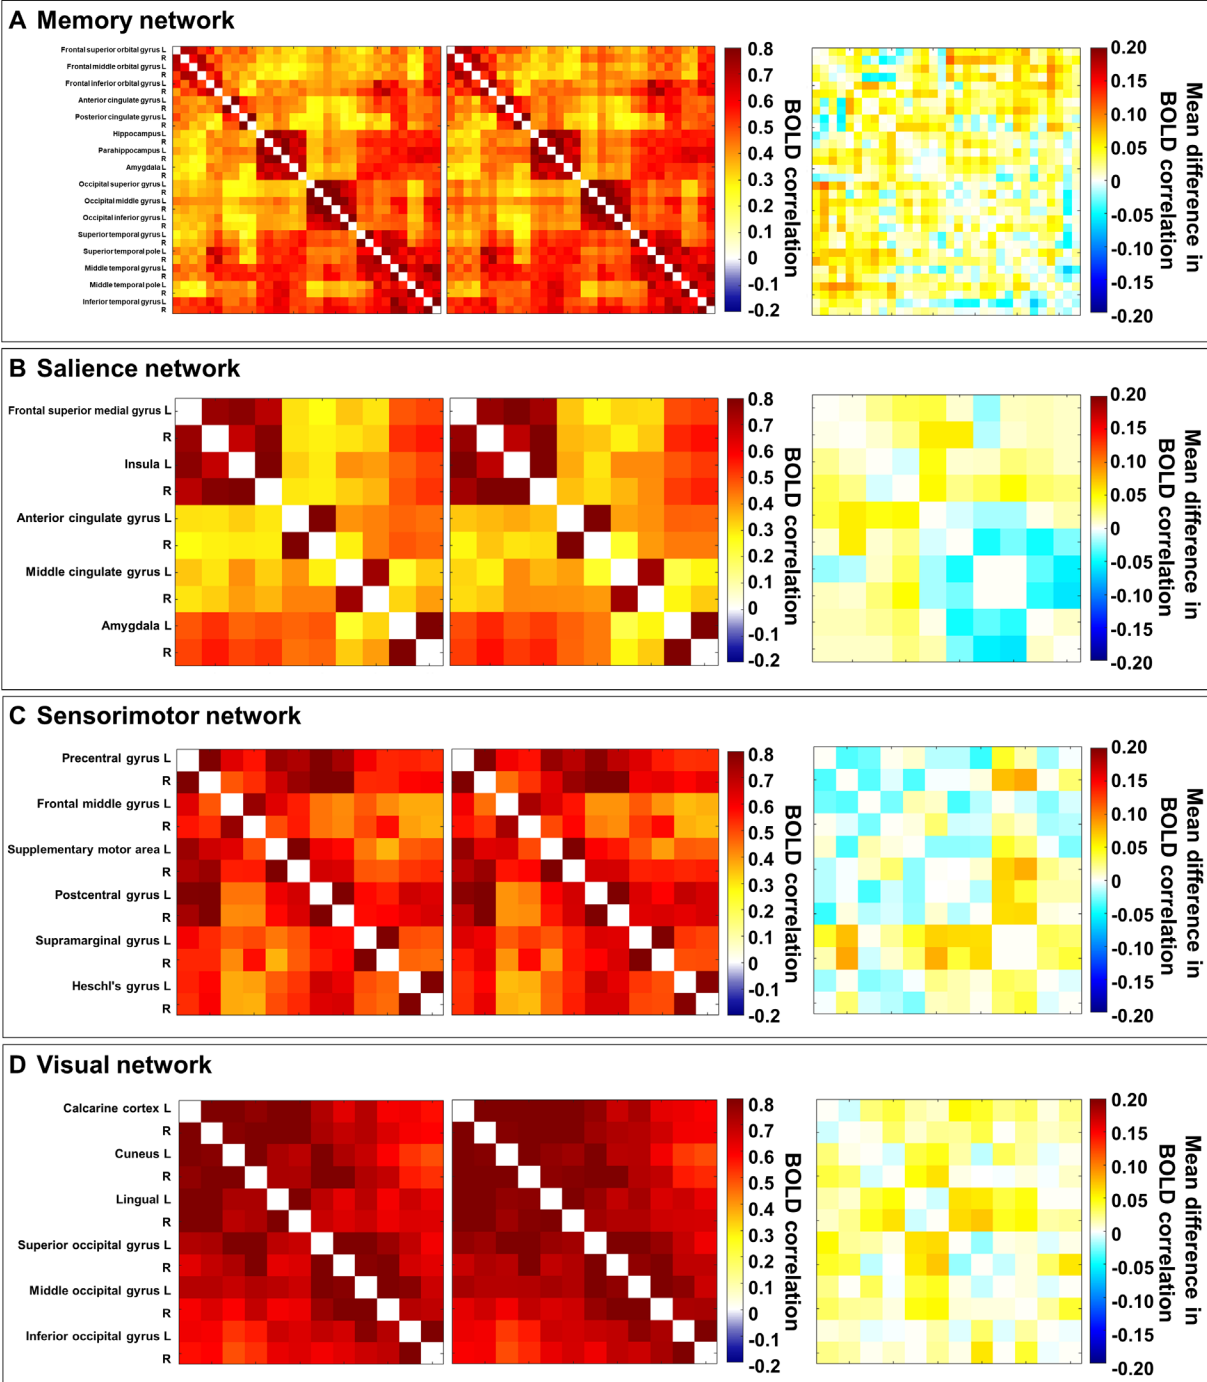

**Figure S6:** Functional connectivity matrices scaled by BOLD correlations indicated by resting-state functional MRI in the (A) memory network (MN), (B) salience network (SN), (C) sensorimotor network (SMN), and (D) visual network (VN) with the mean connectivity for individuals with (i) low blast exposure and (ii) high blast exposure, and (iii) the group difference. There were no blast-related differences in (A) MN, (B) SN, (C) SMN, or (D) VN

functional connectivity as measured by functional MRI. Warm elements in the (i, ii) group mean matrices indicate higher connectivity and cool colours indicate lower connectivity; warm elements in the (iii) group difference matrices indicate higher connectivity in the high blast group and cool colours indicate lower connectivity in the high blast group.
